# Supplementary material for: Modified Delphi procedure-based expert consensus on endpoints for an international disease registry for Metachromatic Leukodystrophy: The European Metachromatic Leukodystrophy initiative (MLDi)
Source: PubMed Central journal article supplement (PMC8842918; doi:10.1186/s13023-022-02189-w), 2022-02-14

Additional file 2 – Flow chart

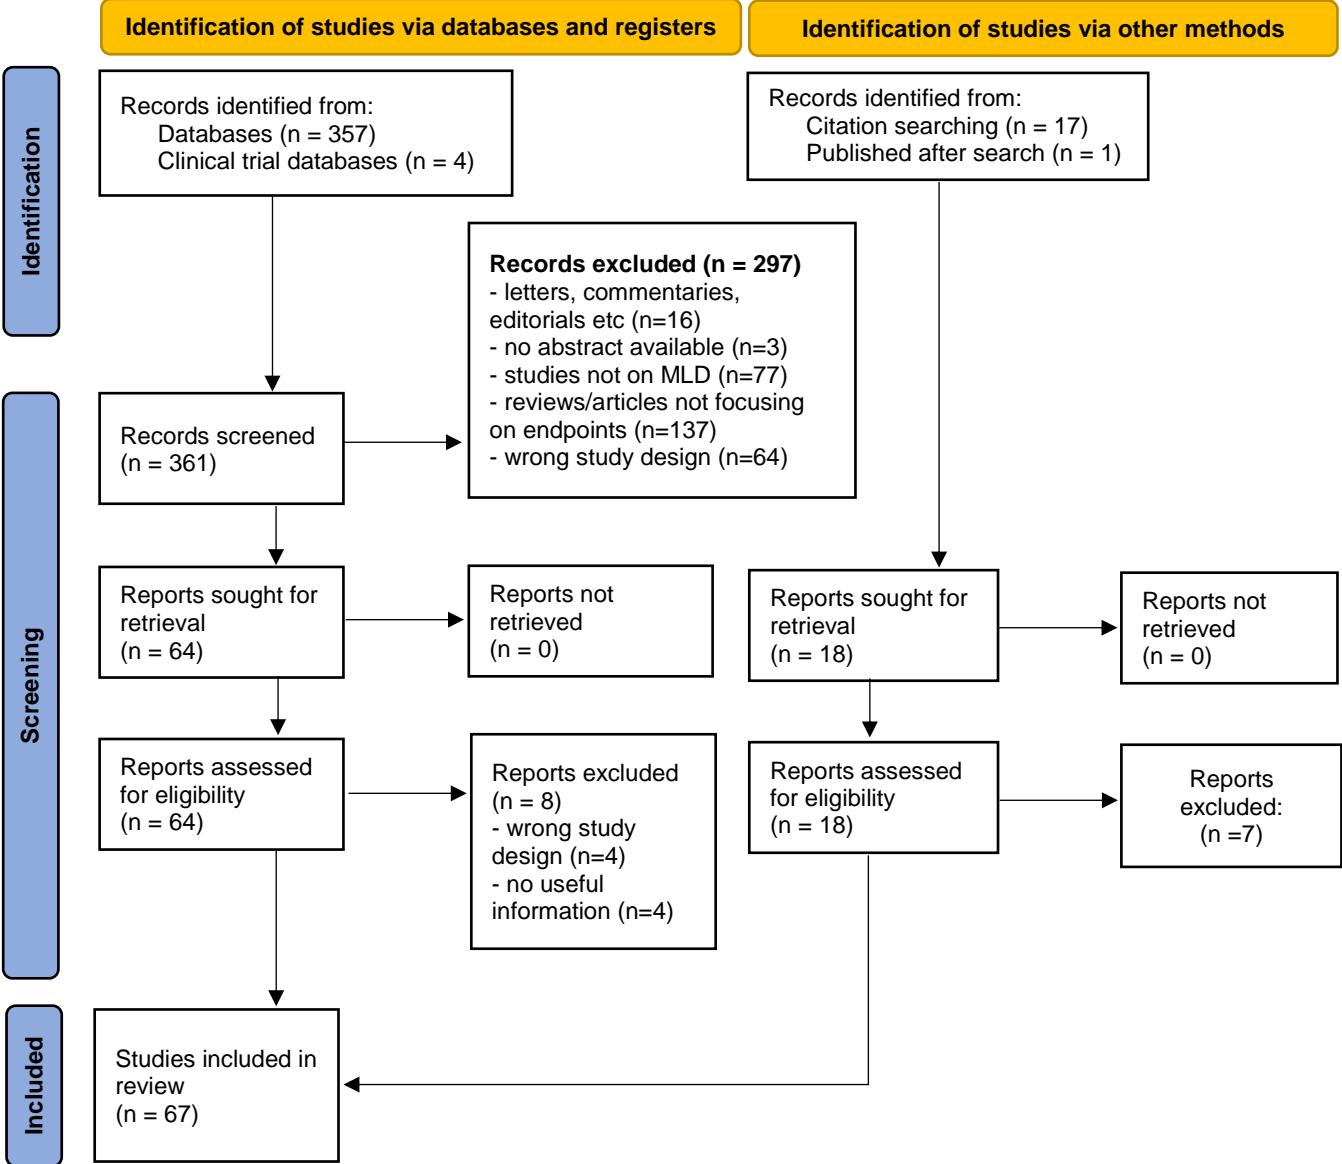

Supplement: 13023_2022_2189_MOESM2_ESM.pdf [file 13023_2022_2189_MOESM2_ESM.pdf]
