# Supplementary material for: Modified Delphi procedure-based expert consensus on endpoints for an international disease registry for Metachromatic Leukodystrophy: The European Metachromatic Leukodystrophy initiative (MLDi)
Source: PubMed Central journal article supplement (PMC8842918; doi:10.1186/s13023-022-02189-w), 2022-02-14
Supplement: 13023_2022_2189_MOESM3_ESM.pdf [file 13023_2022_2189_MOESM3_ESM.pdf]

Additional file 3 - Summary tables literature review

**Supplementary TABLE 1** Levels of Evidence according to The Oxford Centre for Evidence-based Medicine.(1) Level 6 was added to take the input from patients and caregivers into account.

| Level | Therapy / Prevention, Aetiology / Harm                                    | Prognosis                                                                                                                            | Diagnosis                                                                                                                    | Differential diagnosis / symptom prevalence study   | Economic and decision analyses                                                                                                                                  |
|-------|---------------------------------------------------------------------------|--------------------------------------------------------------------------------------------------------------------------------------|------------------------------------------------------------------------------------------------------------------------------|-----------------------------------------------------|-----------------------------------------------------------------------------------------------------------------------------------------------------------------|
| 1a    | SR (with homogeneity) of RCTs                                             | SR (with homogeneity) of inception cohort studies; CDR validated in different populations                                            | SR (with homogeneity) of Level 1 diagnostic studies; CDR with 1b studies from different clinical centres                     | SR (with homogeneity) of prospective cohort studies | SR (with homogeneity) of Level 1 economic studies                                                                                                               |
| 1b    | Individual RCT (with narrow Confidence Interval)                          | Individual inception cohort study with > 80% follow-up; CDR validated in a single population                                         | Validating cohort study with good reference standards; or CDR tested within one clinical centre                              | Prospective cohort study with good follow-up        | Analysis based on clinically sensible costs or alternatives; systematic review(s) of the evidence; and including multi-way sensitivity analyses                 |
| 1c    | All or none                                                               | All or none case-series                                                                                                              | Absolute SpPins and SnNouts                                                                                                  | All or none case-series                             | Absolute better-value or worse-value analyses                                                                                                                   |
| 2a    | SR (with homogeneity) of cohort studies                                   | SR (with homogeneity) of either retrospective cohort studies or untreated control groups in RCTs                                     | SR (with homogeneity) of Level >2 diagnostic studies                                                                         | SR (with homogeneity) of 2b and better studies      | SR (with homogeneity) of Level >2 economic studies                                                                                                              |
| 2b    | Individual cohort study (including low quality RCT; e.g., <80% follow-up) | Retrospective cohort study or follow-up of untreated control patients in an RCT; Derivation of CDR or validated on split-sample only | Exploratory cohort study with good reference standards; CDR after derivation, or validated only on split-sample or databases | Retrospective cohort study, or poor follow-up       | Analysis based on clinically sensible costs or alternatives; limited review(s) of the evidence, or single studies; and including multi-way sensitivity analyses |
| 2c    | "Outcomes" Research; Ecological studies                                   | "Outcomes" Research                                                                                                                  |                                                                                                                              | Ecological studies                                  | Audit or outcomes research                                                                                                                                      |
| 3a    | SR (with homogeneity) of case-control studies                             |                                                                                                                                      | SR (with homogeneity) of 3b and better studies                                                                               | SR (with homogeneity) of 3b and better studies      | SR (with homogeneity) of 3b and better studies                                                                                                                  |

|    |                                                                                                                  |                                                                                                                  |                                                                                                                  |                                                                                                                  |                                                                                                                                                                   |
|----|------------------------------------------------------------------------------------------------------------------|------------------------------------------------------------------------------------------------------------------|------------------------------------------------------------------------------------------------------------------|------------------------------------------------------------------------------------------------------------------|-------------------------------------------------------------------------------------------------------------------------------------------------------------------|
| 3b | Individual Case-Control Study                                                                                    |                                                                                                                  | Non-consecutive study; or without consistently applied reference standards                                       | Non-consecutive cohort study, or very limited population                                                         | Analysis based on limited alternatives or costs, poor quality estimates of data, but including sensitivity analyses incorporating clinically sensible variations. |
| 4  | Case-series (and poor quality cohort and case-control studies)                                                   | Case-series (and poor quality prognostic cohort studies)                                                         | Case-control study, poor or non-independent reference standard                                                   | Case-series or superseded reference standards                                                                    | Analysis with no sensitivity analysis                                                                                                                             |
| 5  | Expert opinion without explicit critical appraisal, or based on physiology, bench research or “first principles” | Expert opinion without explicit critical appraisal, or based on physiology, bench research or “first principles” | Expert opinion without explicit critical appraisal, or based on physiology, bench research or “first principles” | Expert opinion without explicit critical appraisal, or based on physiology, bench research or “first principles” | Expert opinion without explicit critical appraisal, or based on economic theory or “first principles”                                                             |
| 6  | Qualitative research                                                                                             | Qualitative research                                                                                             | Qualitative research                                                                                             | Qualitative research                                                                                             | Qualitative research                                                                                                                                              |
| -  | Inconclusive                                                                                                     | Inconclusive                                                                                                     | Inconclusive                                                                                                     | Inconclusive                                                                                                     | Inconclusive                                                                                                                                                      |

Abbreviations: CDR = Clinical Decision Rule; RCT = randomized controlled trial; SpPins and SnNouts = ‘An “Absolute SpPin” is a diagnostic finding whose Specificity is so high that a Positive result rules-in the diagnosis. An “Absolute SnNout” is a diagnostic finding whose Sensitivity is so high that a Negative result rules-out the diagnosis’; SR = Systematic Review.

1. Bob Phillips CB DS, Doug Badenoch, Sharon Straus, Brian Haynes, Martin Dawes Oxford Centre for Evidence-based Medicine – Levels of Evidence 2009 [updated since November 1998, Updated by Jeremy Howick March 2009. Available from: <https://www.cebm.net/2009/06/oxford-centre-evidence-based-medicine-levels-evidence-march-2009/2009>.

**Supplementary TABLE 2** Summary table of reviewed full texts

| author, year        | Study design                           | Level of evidence | Patients (n = ) | Controls (n = ) | MLD TYPE                                             | Main DATA ELEMENTS (s)                                                                                   | HSCT/GT/ERT | Country         | Full citation                                                                                                                                                                                                                                                           |
|---------------------|----------------------------------------|-------------------|-----------------|-----------------|------------------------------------------------------|----------------------------------------------------------------------------------------------------------|-------------|-----------------|-------------------------------------------------------------------------------------------------------------------------------------------------------------------------------------------------------------------------------------------------------------------------|
| Artigalás, O., 2010 | Cross-sectional retrospective          | 3b                | 29              |                 | Late infantile (n=22), juvenile (n=4), adult (n=1)   | Baseline patient<br>Baseline disease<br>Motor signs<br>Cognition and behaviour<br>MRI<br>Neurophysiology | Untreated   | Brazil          | Artigalás, O., et al. (2010). "Clinical and biochemical study of 29 Brazilian patients with metachromatic leukodystrophy." J Inherit Metab Dis 33 Suppl 3: S257-262.                                                                                                    |
| Assadi, M., 2013    | Case-control study                     | 4                 | 4*              |                 | Late infantile                                       | Magnetic resonance spectroscopy                                                                          | Untreated   | USA             | Assadi, M., et al. (2013). "Multi-Voxel 1H-MRS in Metachromatic Leukodystrophy." J Cent Nerv Syst Dis 5: 25-30.                                                                                                                                                         |
| Assadi, M., 2012    | Open-labeled prospective trial (pilot) | 4                 | 4*              |                 | Late infantile                                       | Magnetic resonance spectroscopy                                                                          | Untreated   | USA             | Assadi, M., et al. (2012). "Vitamin k antagonist warfarin for palliative treatment of metachromatic leukodystrophy, a compassionate study of four subjects." J Cent Nerv Syst Dis 4: 73-79.                                                                             |
| Baumann, N., 2002   | cross-sectional retrospective          | 4                 | 12              |                 | Adult                                                | Genotype-phenotype correlation<br>Motor signs<br>Cognition and behaviour<br>Other clinical signs         | Untreated   | France          | Baumann, N., et al. (2002). "Motor and psycho-cognitive clinical types in adult metachromatic leukodystrophy: Genotype/phenotype relationships?" Journal of Physiology Paris 96(3-4): 301-306.                                                                          |
| Beerepoot, S., 2020 | Retrospective cross-section            | 4                 | 76              |                 | late infantile (n=11), juvenile (n=39), adult (n=17) | Genotype-phenotype correlation                                                                           |             | The Netherlands | Beerepoot S, van Dooren SJM, Salomons GS, et al. Metachromatic leukodystrophy genotypes in The Netherlands reveal novel pathogenic ARSA variants in non-Caucasian patients [published online ahead of print, 2020 Jul 7]. Neurogenetics. 2020;10.1007/s10048-020-00621- |

|                        |                                   |    |               |  |                                                                             |                                                                                                                       |           |                 |                                                                                                                                                                                                      |
|------------------------|-----------------------------------|----|---------------|--|-----------------------------------------------------------------------------|-----------------------------------------------------------------------------------------------------------------------|-----------|-----------------|------------------------------------------------------------------------------------------------------------------------------------------------------------------------------------------------------|
|                        |                                   |    |               |  |                                                                             |                                                                                                                       |           |                 | 6. doi:10.1007/s10048-020-00621-6                                                                                                                                                                    |
| Beerepoot, S., 2019    | Literature review                 | -  |               |  |                                                                             | Peripheral neuropathy                                                                                                 |           | The Netherlands | Beerepoot, S., et al. (2019). "Peripheral neuropathy in metachromatic leukodystrophy: current status and future perspective." Orphanet J Rare Dis 14(1): 240.                                        |
| Biffi, A. 2008         | Cross-sectional                   | 2b | 26            |  | Late infantile (n=16), early-juvenile (n=7), late-juvenile (n=2), adult (1) | Genotype-phenotype correlation                                                                                        | Untreated | Italy           | Biffi, A., et al. (2008). "Metachromatic leukodystrophy - mutation analysis provides further evidence of genotype-phenotype correlation." Clin Genet 74(4): 349-357.                                 |
| Biffi, A. 2013         | Clinical trial                    | 4  | 3             |  | Late infantile                                                              | HSCT-GT                                                                                                               | GT        | Italy           | Biffi A, Montini E, Lorioli L, Cesani M, Fumagalli F, Plati T, et al. Lentiviral hematopoietic stem cell gene therapy benefits metachromatic leukodystrophy. Science (New York, NY). 2013;341(6148). |
| Bindu, P. S., 2005     | Single-centre cohort              | 2b | 40            |  | Late infantile (n=36), juvenile (n=4)                                       | Baseline patient<br>Baseline disease<br>Motor signs<br>Cognition and behaviour<br>MRI<br>Neurophysiology<br>Pathology | Untreated | India           | Bindu, P. S., et al. (2005). "Peripheral neuropathy in metachromatic leucodystrophy. A study of 40 cases from south India." J Neurol Neurosurg Psychiatry 76(12): 1698-1701.                         |
| Bonkowsky, J. L., 2018 | Case-control study, retrospective | -  | (557) 139 MLD |  | ?                                                                           | Race/ethnicity                                                                                                        | ?         | USA             | Bonkowsky, J. L., et al. (2018). "Association of Diagnosis of Leukodystrophy With Race and Ethnicity Among Pediatric and Adolescent Patients." JAMA Netw Open 1(7): e185031.                         |

|                      |                                      |    |    |   |                                                    |                                       |           |         |                                                                                                                                                                                                                                 |
|----------------------|--------------------------------------|----|----|---|----------------------------------------------------|---------------------------------------|-----------|---------|---------------------------------------------------------------------------------------------------------------------------------------------------------------------------------------------------------------------------------|
| Boucher, A. A., 2015 | Single-centre cohort, retrospective  | 2c | 40 |   | Late infantile (n=4), juvenile (n=27), adult (n=9) | HSCT related                          | HSCT      | USA     | Boucher, A. A., et al. (2015). "Long-term outcomes after allogeneic hematopoietic stem cell transplantation for metachromatic leukodystrophy: the largest single-institution cohort report." <i>Orphanet J Rare Dis</i> 10: 94. |
| Brown, T. M., 2017   | Literature review and qualitative    | 2b | 5  |   | Juvenile                                           | Quality of life and impact of disease | untreated | USA     | Brown, T. M., et al. (2017). "Development of the Impact of Juvenile Metachromatic Leukodystrophy on Physical Activities scale." <i>J Patient Rep Outcomes</i> 2(1): 15.                                                         |
| Cameron, C. L., 2004 | Retrospective cohort                 | 3b | 9  |   | Late infantile or early juvenile                   | Neurophysiology                       | ?         | USA     | Cameron, C. L., et al. (2004). "Multifocal slowing of nerve conduction in metachromatic leukodystrophy." <i>Muscle and Nerve</i> 29(4): 531-536.                                                                                |
| Cesani, M., 2016     | Systematic review                    | 2a |    |   |                                                    | Genotype<br>Genotype-phenotype        |           | Italy   | Cesani M, Lorioli L, Grossi S, Amico G, Fumagalli F, Spiga I, et al. Mutation Update of ARSA and PSAP Genes Causing Metachromatic Leukodystrophy. <i>Hum Mutat.</i> 2016;37(1):16-27.                                           |
| Chen, X., 2016       | Case-control with untreated siblings | 3b | 3  | 2 | Early juvenile                                     | UCBT related                          | UBCT      | China   | Chen, X., et al. (2016). "Outcome of Early Juvenile Onset Metachromatic Leukodystrophy after Unrelated Cord Blood Transplantation." <i>Journal of Child Neurology</i> 31(3): 338-344.                                           |
| Clas, P., 2012       | reproduction/validation study        | 1b | 35 |   | .                                                  | MRI                                   | Untreated | Germany | Clas, P., et al. (2012). "A semi-automatic algorithm for determining the demyelination load in metachromatic leukodystrophy." <i>Acad Radiol</i> 19(1): 26-34.                                                                  |

|                        |                                                                        |    |                              |  |                                                     |                                                                                                  |           |                 |                                                                                                                                                                                                                                                                                |
|------------------------|------------------------------------------------------------------------|----|------------------------------|--|-----------------------------------------------------|--------------------------------------------------------------------------------------------------|-----------|-----------------|--------------------------------------------------------------------------------------------------------------------------------------------------------------------------------------------------------------------------------------------------------------------------------|
| Dali, C., 2010         | Cross-section                                                          | 2b | 13**                         |  | Late infantile                                      | Magnetic Resonance Spectroscopy                                                                  | Untreated | Denmark         | Dali, C., et al. (2010). "Brain N-acetylaspartate levels correlate with motor function in metachromatic leukodystrophy." <i>Neurology</i> 75(21): 1896-1903.                                                                                                                   |
| Dali, Cí, 2015         | Cross-section                                                          | 2b | 13**                         |  | Late-infantile                                      | Neurophysiology<br>Magnetic Resonance Spectroscopy<br>Lab results                                | Untreated | Denmark         | Dali, C., et al. (2015). "Sulfatide levels correlate with severity of neuropathy in metachromatic leukodystrophy." <i>Ann Clin Transl Neurol</i> 2(5): 518-533.                                                                                                                |
| Dali, C, 2020          | Clinical trial, multi-center non-randomized open label phase 1/2 trial | 3b | 24                           |  | Late-infantile                                      | Safety and tolerability of intrathecal administration of rhASA<br>Neurophysiology<br>Lab results | ERT       | Denmark/France  | Dali C, Sevin C, Krageloh-Mann I, Giugliani R, Sakai N, Wu J, et al. Safety of intrathecal delivery of recombinant human arylsulfatase A in children with metachromatic leukodystrophy: Results from a phase 1/2 clinical trial. <i>Mol Genet Metab.</i> 2020;131(1-2):235-44. |
| De Hosson, L. D., 2011 | Cohort, prospective?                                                   | 4  | 5                            |  | Adult                                               | HSCT related                                                                                     | Allo-SCT  | The Netherlands | De Hosson, L. D., et al. (2011). "Adult metachromatic leukodystrophy treated by allo-SCT and a review of the literature." <i>Bone Marrow Transplantation</i> 46(8): 1071-1076.                                                                                                 |
| Eichler, F. S., 2016   | Qualitative study, multi-centre                                        | -  | 30 caregivers of 23 patients |  | Late-infantile (n=19, juvenile (n=7), adult (n=4)   | Quality of life and impact of disease                                                            | .         | USA             | Eichler, F. S., et al. (2016). "Metachromatic Leukodystrophy: An Assessment of Disease Burden." <i>J Child Neurol</i> 31(13): 1457-1463.                                                                                                                                       |
| Eichler, F., 2009      | Cross-section                                                          | 1b | 28                           |  | Late infantile (n=10), Juvenile (n=16), adult (n=2) | MRI                                                                                              | .         | Germany         | Eichler, F., et al. (2009). "Metachromatic leukodystrophy: a scoring system for brain MR imaging observations." <i>AJNR Am J Neuroradiol</i> 30(10): 1893-1897.                                                                                                                |

|                      |                             |    |                                         |    |                                                                                                |                                                          |           |                          |                                                                                                                                                                                                                                              |
|----------------------|-----------------------------|----|-----------------------------------------|----|------------------------------------------------------------------------------------------------|----------------------------------------------------------|-----------|--------------------------|----------------------------------------------------------------------------------------------------------------------------------------------------------------------------------------------------------------------------------------------|
| Elgün, S., 2019      | Retrospective cross-section | 2b | 12 sibling-pairs and 61 single patients |    | sibling-pairs (3 late-infantile, 9 juvenile), single patients (29 late-infantile, 32 juvenile) | Genotype-phenotype correlation                           | Untreated | Germany, The Netherlands | Elgün, S., et al. (2019). "Phenotypic variation between siblings with Metachromatic Leukodystrophy." Orphanet Journal of Rare Diseases 14(1).                                                                                                |
| Groeschel, S., 2011  | Longitudinal cross-section  | 2b | 68                                      |    | Late infantile (n=33), juvenile (n=35)                                                         | MRI                                                      | .         | Germany                  | Groeschel, S., et al. (2011). "Metachromatic leukodystrophy: natural course of cerebral MRI changes in relation to clinical course." J Inherit Metab Dis 34(5): 1095-1102.                                                                   |
| Groeschel, S., 2012  | Cross-section, case-control | 4  | 18**                                    | 42 | Late infantile                                                                                 | MRI                                                      | .         | Germany                  | Groeschel, S., et al. (2012). "Cerebral gray and white matter changes and clinical course in metachromatic leukodystrophy." Neurology 79(16): 1662-1670.                                                                                     |
| Groeschel, S., 2016  | Case-control, retrospective | 3b | 24                                      | 41 | juvenile                                                                                       | HSCT related                                             | HSCT      | Germany                  | Groeschel, S., et al. (2016). "Long-term Outcome of Allogeneic Hematopoietic Stem Cell Transplantation in Patients With Juvenile Metachromatic Leukodystrophy Compared With Nontransplanted Control Patients." JAMA Neurol 73(9): 1133-1140. |
| Harrington, M., 2019 | Qualitative study           | -  | 32 caregivers                           |    | late infantile (n=16), juvenile (n=16)                                                         | Quality of life and impact of disease                    | 3 SCT     | USA                      | Harrington, M., et al. (2019). "Insights into the natural history of metachromatic leukodystrophy from interviews with caregivers." Orphanet J Rare Dis 14(1): 89.                                                                           |
| Jabbehdari, S., 2015 | Observational cross section | 3b | 18                                      |    | Late infantile (n=12), juvenile (n=6)                                                          | Baseline patient<br>Baseline disease<br>Cognition<br>MRI | Untreated | Iran                     | Jabbehdari, S., et al. (2015). "The clinical features and diagnosis of Metachromatic leukodystrophy: A case series of Iranian Pediatric                                                                                                      |

|                         |                                      |    |                        |    |                                        |                               |           |         |                                                                                                                                                                                                  |
|-------------------------|--------------------------------------|----|------------------------|----|----------------------------------------|-------------------------------|-----------|---------|--------------------------------------------------------------------------------------------------------------------------------------------------------------------------------------------------|
|                         |                                      |    |                        |    |                                        |                               |           |         | Patients." Iran J Child Neurol 9(3): 57-61.                                                                                                                                                      |
| Kehrer, C. 2011         | Prospective and retrospective cohort | 1b | 59***                  |    | late infantile (n=21), juvenile (n=38) | Motor signs                   | Untreated | Germany | Kehrer, C., et al. (2011). "Development and reliability of a classification system for gross motor function in children with metachromatic leucodystrophy." Dev Med Child Neurol 53(2): 156-160. |
| Kehrer, C., 2011        | Prospective and retrospective cohort | 2b | 59***                  |    | late infantile (n=21), juvenile (n=38) | Motor signs                   | Untreated | Germany | Kehrer, C., et al. (2011). "The natural course of gross motor deterioration in metachromatic leukodystrophy." Dev Med Child Neurol 53(9): 850-855.                                               |
| Kehrer, C., 2014        | Prospective and retrospective cohort | 2b | 59***                  |    | late infantile (n=21), juvenile (n=38) | Language Cognition            | Untreated | Germany | Kehrer, C., et al. (2014). "Language and cognition in children with metachromatic leukodystrophy: onset and natural course in a nationwide cohort." Orphanet J Rare Dis 9: 18.                   |
| Kim TS, 1997            | Retrospective cross-section          | 4  | 7                      |    | Late infantile                         | MRI                           | Untreated | Korea   | Kim TS, Kim I-O, Kim WS et al. MR in childhood metachromaticleukodystrophy. AmJNeuroradiol1997;18:733-738.                                                                                       |
| Kim, J., 2017           | Retrospective cohort                 | 2b | 29 MLD, ALD/Krabbe: 58 | .  | ?                                      | Gall bladder related          | HSCT      | USA     | Kim, J., et al. (2017). "Gallbladder abnormalities in children with metachromatic leukodystrophy." J Surg Res 208: 187-191.                                                                      |
| Koç, O. N., 2002        | Clinical trial                       | 4  | 6                      |    | ?                                      | Mesenchymal stem cell related | HSCT      | USA     | Koç, O. N., et al. (2002). "Allogeneic mesenchymal stem cell infusion for treatment of metachromatic leukodystrophy (MLD) and Hurler syndrome (MPS-IH)." Bone Marrow Transplant 30(4): 215-222.  |
| Krägeloh-Mann, I., 2013 | Case-control                         | 3b | 2                      | 67 | Juvenile                               | HSCT related                  | HSCT      | Germany | Krägeloh-Mann, I., et al. (2013). "Juvenile metachromatic                                                                                                                                        |



|                    |                                   |    |    |    |                                                                                 |                                       |        |        |                                                                                                                                                                                                                                                                                                                                              |
|--------------------|-----------------------------------|----|----|----|---------------------------------------------------------------------------------|---------------------------------------|--------|--------|----------------------------------------------------------------------------------------------------------------------------------------------------------------------------------------------------------------------------------------------------------------------------------------------------------------------------------------------|
|                    |                                   |    |    |    |                                                                                 |                                       |        |        | leukodystrophy 10 years post transplant compared with a non-transplanted cohort." Bone Marrow Transplantation 48(3): 369-375.                                                                                                                                                                                                                |
| Lorioli, L., 2015  | Retrospective cohort              | 2b | 24 |    | Late infantile (n=13), early-juvenile (11/24)                                   | Lab results (metabolic acidosis)      | HSC-GT | Italy  | Lorioli, L., et al. (2015). "Abnormalities of acid-base balance and predisposition to metabolic acidosis in Metachromatic Leukodystrophy patients." Molecular Genetics and Metabolism 115(1): 48-52.                                                                                                                                         |
| Lugowska, A., 1997 | Diagnostic method study           | 1b | 49 | 30 |                                                                                 | Lab results                           | .      | Poland | Ługowska, A., Tylki-Szymańska, A., Berger, J., & Molzer, B. (1997). Elevated sulfatide excretion in compound heterozygotes of metachromatic leukodystrophy and ASA-pseudodeficiency allele. Clinical Biochemistry, 30(4), 325–331. <a href="https://doi.org/10.1016/S0009-9120(97)00033-7">https://doi.org/10.1016/S0009-9120(97)00033-7</a> |
| Lugowska, A., 2005 | Cross-section                     | 2b | 43 |    | Late infantile (n=14), early juvenile (n=11), late-juvenile (n=7), adult (n=11) | Genotype-phenotype correlation        | .      | Poland | Ługowska, A., et al. (2005). "Molecular and phenotypic characteristics of metachromatic leukodystrophy patients from Poland." Clin Genet 68(1): 48-54.                                                                                                                                                                                       |
| Mahmood, A., 2010  | Case report and systematic review | 4  | 3  |    | Late infantile                                                                  | Survival<br>Natural disease course    | .      | USA    | Mahmood, A., et al. (2010). "Metachromatic leukodystrophy: A case of triplets with the late infantile variant and a systematic review of the literature." Journal of Child Neurology 25(5): 572-580.                                                                                                                                         |
| Malcolm, C., 2011  | Qualitative                       | -  |    |    |                                                                                 | Quality of life and impact of disease |        | UK     | Malcolm, C., et al. (2011). "Challenging symptom profiles of                                                                                                                                                                                                                                                                                 |

|                  |                                      |    |            |  |                                        |                                     |      |        |                                                                                                                                                                                                                                                                                                                                                                                                                                                                                      |
|------------------|--------------------------------------|----|------------|--|----------------------------------------|-------------------------------------|------|--------|--------------------------------------------------------------------------------------------------------------------------------------------------------------------------------------------------------------------------------------------------------------------------------------------------------------------------------------------------------------------------------------------------------------------------------------------------------------------------------------|
|                  |                                      |    |            |  |                                        |                                     |      |        | life-limiting conditions in children: a survey of care professionals and families." Palliat Med 25(4): 357-364.                                                                                                                                                                                                                                                                                                                                                                      |
| Martin, A, 2006  | Clinical trial, phase 2 multi-centre | 4  | 69 (6 MLD) |  |                                        | UCBT related                        | UBCT | USA    | Martin, P. L., Carter, S. L., Kernan, N. A., Sahdev, I., Wall, D., Pietryga, D., ... Kurtzberg, J. (2006). Results of the Cord Blood Transplantation Study (COBLT): Outcomes of unrelated donor umbilical cord blood transplantation in pediatric patients with lysosomal and peroxisomal storage diseases. <i>Biology of Blood and Marrow Transplantation</i> , 12(2), 184–194. <a href="https://doi.org/10.1016/j.bbmt.2005.09.016">https://doi.org/10.1016/j.bbmt.2005.09.016</a> |
| Martin, A., 2012 | Retrospective case-control           | 4  | 13         |  | Late infantile, early juvenile         | MRI Magnetic Resonance Spectroscopy | .    | France | Martin, A., et al. (2012). "Toward a better understanding of brain lesions during metachromatic leukodystrophy evolution." <i>AJNR Am J Neuroradiol</i> 33(9): 1731-1739.                                                                                                                                                                                                                                                                                                            |
| Martin, A., 2013 | Retrospective cohort                 | 2b | 27         |  | Late infantile (n=10), juvenile (n=17) | UCBT related                        | HSCT | USA    | Martin, H. R., et al. (2013). "Neurodevelopmental outcomes of umbilical cord blood transplantation in metachromatic leukodystrophy." <i>Biol Blood Marrow Transplant</i> 19(4): 616-624.                                                                                                                                                                                                                                                                                             |
| Martin, HR 2008  | Retrospective review                 | 4  |            |  |                                        | Cognition                           |      |        | Martin HR, Poe MD, Reinhartsen D, et al. Methods for assessing neurodevelopment in lysosomal storage diseases and related disorders: a multi-disciplinary perspective.                                                                                                                                                                                                                                                                                                               |

|                       |                                             |    |    |                               |                                                              |                      |                  |        |                                                                                                                                                                                                                                                               |
|-----------------------|---------------------------------------------|----|----|-------------------------------|--------------------------------------------------------------|----------------------|------------------|--------|---------------------------------------------------------------------------------------------------------------------------------------------------------------------------------------------------------------------------------------------------------------|
|                       |                                             |    |    |                               |                                                              |                      |                  |        | Acta Paediatr. 2008;97(Suppl.): 69-75.                                                                                                                                                                                                                        |
| Parikh s., 2015       | Systematic review                           | 3a |    |                               | Leukodystrophies                                             | Clinical diagnostics |                  | USA    | Parikh S, Bernard G, Leventer RJ, van der Knaap MS, van Hove J, Pizzino A, et al. A clinical approach to the diagnosis of patients with leukodystrophies and genetic leukoencephalopathies. Mol Genet Metab. 2015;114(4):501-15                               |
| Raina, A., 2019       | Retrospective cross section                 | 3b | 12 |                               | Juvenile (n=8), late infantile (n=4)                         | Neurophysiology MRI  | untreated?       | India  | Raina, A., et al. (2019). "Electroneurography and advanced neuroimaging profile in pediatric-onset metachromatic leukodystrophy." Journal of Pediatric Neurosciences 14(2): 70-75.                                                                            |
| Saute, J. A. M., 2016 | Retrospective cohort                        | 4  | 2  |                               |                                                              | HSCT related         | HSCT             | Brazil | Saute, J. A. M., et al. (2016). "Neurological outcomes after hematopoietic stem cell transplantation for cerebral X-linked adrenoleukodystrophy, late onset metachromatic leukodystrophy and hurler syndrome." Arquivos de Neuro-Psiquiatria 74(12): 953-966. |
| Sessa, M., 2016       | Non-randomised, open label, phase 1/2 trial | 3b | 9  | historical untreated controls | Late- infantile (n=6), early-juvenile (n=2), undefined (n=1) | HSCT-GT related      | HSC-GT           | Italy  | Sessa, M., et al. (2016). "Lentiviral haemopoietic stem-cell gene therapy in early-onset metachromatic leukodystrophy: an ad-hoc analysis of a non-randomised, open-label, phase 1/2 trial." Lancet 388(10043): 476-487.                                      |
| Sevin C, 2018         | Clinical trial                              | 4  | 4  |                               | Late infantile (n=3), juvenile (n=1)                         | Intracerebral GT     | Intracerebral GT | France | Sevin C, Roujeau T, Cartier N, et al. Intracerebral gene therapy in children with metachromatic leukodystrophy: Results of a phase                                                                                                                            |

|                      |                            |    |    |    |                                                                              |                       |           |                 |                                                                                                                                                                                  |
|----------------------|----------------------------|----|----|----|------------------------------------------------------------------------------|-----------------------|-----------|-----------------|----------------------------------------------------------------------------------------------------------------------------------------------------------------------------------|
|                      |                            |    |    |    |                                                                              |                       |           |                 | I/II trial. Molecular Genetics and Metabolism 2018;123(2):S129-S29. doi: 10.1016/j.ymgme.2017.12.352                                                                             |
| Solders, M., 2014    | Case control               | 3b | 4  | 3  | Adult                                                                        | HSCT related          | HSCT      | Sweden          | Solders, M., et al. (2014). "Hematopoietic SCT: a useful treatment for late metachromatic leukodystrophy." Bone Marrow Transplant 49(8): 1046-1051.                              |
| Strölin, M., 2017    | Retrospective cohort       | 2b | 46 |    | Juvenile                                                                     | MRI                   | .         | Germany         | Strölin, M., et al. (2017). "Demyelination load as predictor for disease progression in juvenile metachromatic leukodystrophy." Ann Clin Transl Neurol 4(6): 403-410.            |
| Tan, m.a., 2010      | Validation study           | 1b | 11 | 18 | Late infantile (n=5), juvenile (n=5), adult (n=3)                            | Biochemical diagnosis |           | Australia       | Tan MA, Fuller M, Zabidi-Hussin ZA, Hopwood JJ, Meikle PJ. Biochemical profiling to predict disease severity in metachromatic leukodystrophy. Mol Genet Metab. 2010;99(2):142-8. |
| Thibert, K. A., 2016 | Case control               | 4  | 8  |    | Late infantile (n=1), early juvenile (n=2), late juvenile (n=2), adult (n=3) | Lab results           | .         | USA             | Thibert, K. A., et al. (2016). "Cerebral Spinal Fluid levels of Cytokines are elevated in Patients with Metachromatic Leukodystrophy." Sci Rep 6: 24579.                         |
| Tillema, J. M., 2015 | Retrospective case-control | 2b | 20 | 20 | Late infantile (n=3), juvenile (n=11), adult (n=6)                           | MRI                   | Untreated | The Netherlands | Tillema, J. M., et al. (2015). "Volumetric MRI data correlate to disease severity in metachromatic leukodystrophy." Ann Clin Transl Neurol 2(9): 932-940.                        |
| Toldo, I. 2005       | Case report                | 5  | 1  |    | Late infantile (n=1)                                                         | Spinal cord           |           | Germany         | Toldo I, Carollo C, Battistella PA, Laverda AM. Spinal cord and cauda equina MRI findings in metachromatic leukodystrophy:                                                       |

|                          |                            |    |    |                 |                                                    |                                                                 |            |                 |                                                                                                                                                                                                                    |
|--------------------------|----------------------------|----|----|-----------------|----------------------------------------------------|-----------------------------------------------------------------|------------|-----------------|--------------------------------------------------------------------------------------------------------------------------------------------------------------------------------------------------------------------|
|                          |                            |    |    |                 |                                                    |                                                                 |            |                 | case report. <i>Neuroradiology</i> . 2005;47(8):572-5.                                                                                                                                                             |
| van der Veldt, N., 2019  | Case series + case control | 3b | 10 | 8 (CP patients) | Early juvenile (n=3), late juvenile (n=7)          | Motor signs<br>Intrathecal Baclofen related                     | Untreated  | The Netherlands | van der Veldt, N., et al. (2019). "Intrathecal baclofen in metachromatic leukodystrophy." <i>Developmental Medicine and Child Neurology</i> 61(2): 232-235.                                                        |
| van rappard, d.f., 2015  | Systematic review          | 3a |    |                 |                                                    | Clinical diagnosis<br>Clinical spectrum<br>Treatment approaches |            | The Netherlands | van Rappard DF, Boelens JJ, Wolf NI. Metachromatic leukodystrophy: Disease spectrum and approaches for treatment. <i>Best practice &amp; research Clinical endocrinology &amp; metabolism</i> . 2015;29(2):261-73. |
| van Rappard, D. F., 2016 | Retrospective cohort       | 3b | 13 | 22 (untreated ) | Late infantile (n=8), Juvenile (n=18), adult (n=9) | HSCT related                                                    | HSCT       | The Netherlands | van Rappard, D. F., et al. (2016). "Efficacy of hematopoietic cell transplantation in metachromatic leukodystrophy: the Dutch experience." <i>Blood</i> 127(24): 3098-3101.                                        |
| Van Rappard, D. F., 2016 | Retrospective cohort       | 3b | 34 |                 | Late infantile (n=4), juvenile (n=22), adult (n=9) | Gall bladder related                                            | 14/34 HSCT | The Netherlands | Van Rappard, D. F., et al. (2016). "Gallbladder and the risk of polyps and carcinoma in metachromatic leukodystrophy." <i>Neurology</i> 87(1): 103-111.                                                            |
| van Rappard, D. F., 2018 | Case series                | 4  | 4  |                 |                                                    | Psychiatric signs                                               | 2/4 HSCT   | The Netherlands | van Rappard, D. F., et al. (2018). "Slowly Progressive Psychiatric Symptoms: Think Metachromatic Leukodystrophy." <i>J Am Acad Child Adolesc Psychiatry</i> 57(2): 74-76.                                          |
| van Rappard, D. F., 2018 | Retrospective cohort       | 1b | 21 | 16              | Juvenile (n=12), adult (n=9)                       | Magnetic Resonance Spectroscopy                                 | 12/21 HSCT | The Netherlands | van Rappard, D. F., et al. (2018). "Quantitative MR spectroscopic imaging in metachromatic leukodystrophy: value for prognosis and treatment." <i>J Neurol Neurosurg Psychiatry</i> 89(1): 105-111.                |

|                  |                      |    |                 |  |                |                    |               |        |                                                                                                                                                                                                                                                    |
|------------------|----------------------|----|-----------------|--|----------------|--------------------|---------------|--------|----------------------------------------------------------------------------------------------------------------------------------------------------------------------------------------------------------------------------------------------------|
| Wadhwa, A., 2019 | Retrospective cohort | 2b | 273 (10.2% MLD) |  |                | HSCT related       | HSCT (BM, CB) | USA    | Wadhwa, A., et al. (2019). "Late Mortality after Allogeneic Blood or Marrow Transplantation for Inborn Errors of Metabolism: A Report from the Blood or Marrow Transplant Survivor Study-2 (BMTSS-2)." Biol Blood Marrow Transplant 25(2): 328-334 |
| Yavuz, H., 2011  | Case report          | 5  | 1               |  | Late infantile | Abdominal symptoms | Untreated     | Turkey | Yavuz, H. and H. A. Yükksekaya (2011). "Intestinal involvement in metachromatic leukodystrophy." J Child Neurol 26(1): 117-120.                                                                                                                    |

Legend

Level of evidence according to Supplementary table 3.

\* same cohort

\*\* (partly) same cohort

\*\*\* same cohort

**Supplementary TABLE 3** Summary table of reviewed trial protocols in literature review

| Trial identification no. |                | Trial description                                                                                                                                                                                                                                                                                                                                                                                                                                                                                                                                                                                            |
|--------------------------|----------------|--------------------------------------------------------------------------------------------------------------------------------------------------------------------------------------------------------------------------------------------------------------------------------------------------------------------------------------------------------------------------------------------------------------------------------------------------------------------------------------------------------------------------------------------------------------------------------------------------------------|
| NCT01510028              | Clinical trial | Multicenter Study of HGT-1110 Administered Intrathecally in Children With Metachromatic Leukodystrophy (MLD)                                                                                                                                                                                                                                                                                                                                                                                                                                                                                                 |
| NCT01560182              | Clinical trial | This Phase I/II clinical trial consists of the application of lentiviral vector-based gene therapy to patients affected by Metachromatic Leukodystrophy (MLD), a rare inherited Lysosomal Storage Disorder (LSD) resulting from mutations in the gene encoding the Arylsulfatase A (ARSA) enzyme. The medicinal product consists of autologous CD34+ hematopoietic stem/progenitor cells in which a functional ARSA cDNA is introduced by means of 3rd generation VSV-G pseudotyped lentiviral vectors.                                                                                                      |
| NCT02559830              | Clinical trial | Evaluating the safety and efficacy of Lentiviral Hematopoietic Stem Cell Gene Therapy for advanced stage of Metachromatic Leukodystrophy and adrenoleukodystrophy.                                                                                                                                                                                                                                                                                                                                                                                                                                           |
| NCT03392987              | Clinical trial | OTL-200 is autologous CD34+ cells transduced with lentiviral vector containing human arylsulfatase A (ARSA) complementary deoxyribonucleic acid (cDNA) used for the treatment of MLD. MLD is an autosomal recessive lysosomal storage disorder (LSD) characterized by severe and progressive demyelination affecting the central and peripheral nervous system. This study will assess safety and efficacy of treatment using cryopreserved formulation of OTL-200 in pediatric subjects with pre-symptomatic Early Onset MLD (Late Infantile (LI) to Early Juvenile (EJ) MLD) and early symptomatic EJ MLD. |
